# Supplementary material for: Activated Alpha-2 Macroglobulin Improves Insulin Response via LRP1 in Lipid-Loaded HL-1 Cardiomyocytes
Source: MDPI journal article supplement (doi:10.3390/ijms22136915), 2021-06-28
Supplement: s1 [file s1]

# Activated alpha-2 Macroglobulin via LRP1 improves insulin response in lipid-loaded HL-1 cardiomyocytes.

Actis Dato Virginia, Chiabrando Gustavo A

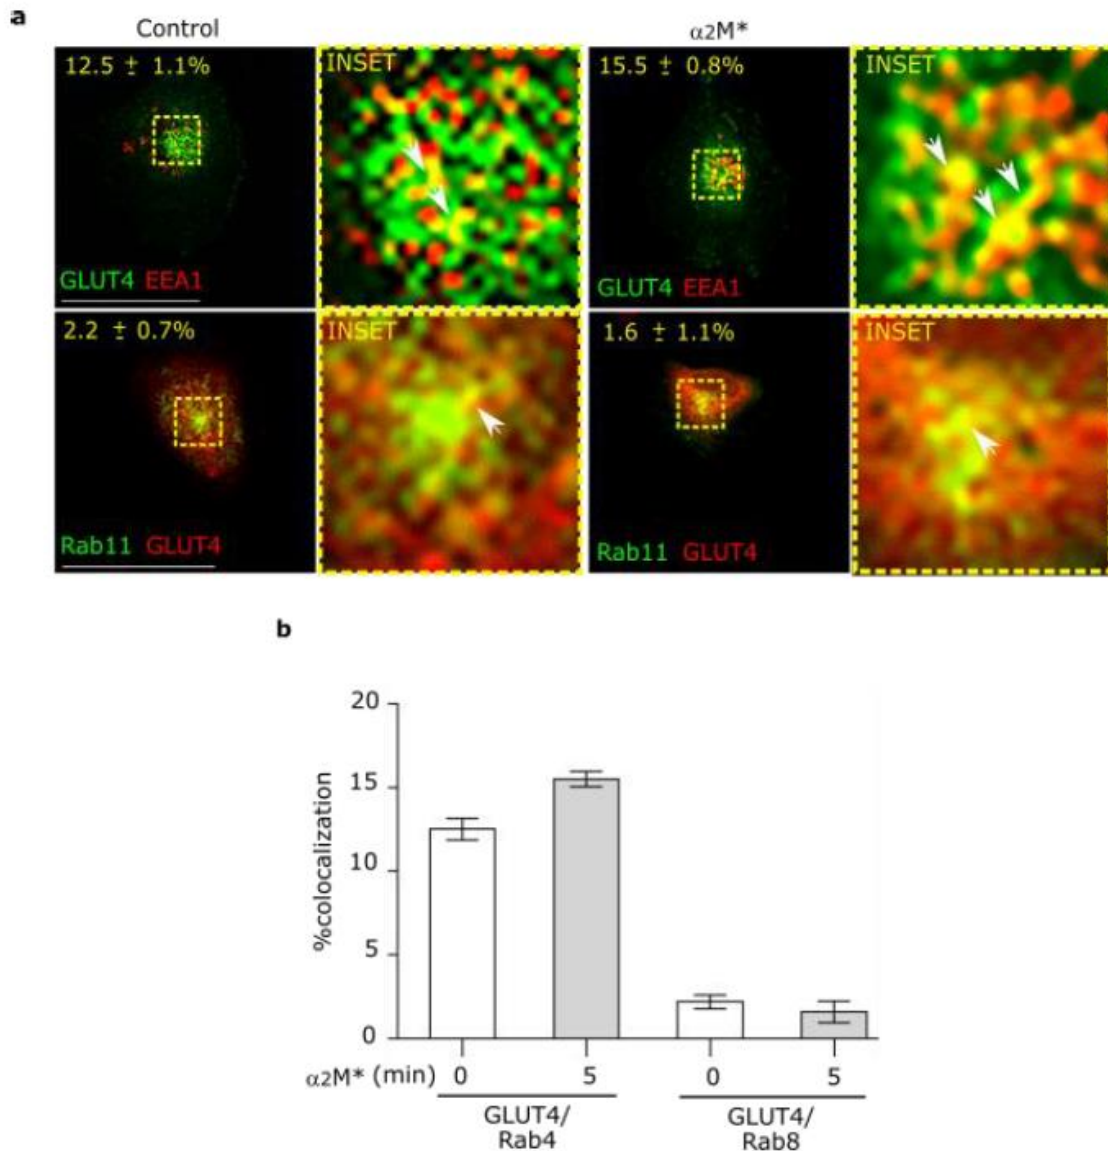

**Figure S1.** (a) Confocal microscopy in cells treated with  $\alpha 2M^*$  (60nM) for 5 min at 37°C. Images show colocalization between GLUT4 and EEA1 (red) or Rab11 (green). INSET represents magnification 4X of framed regions in dotted lines. White arrowheads indicate colocalization sectors. Scale bar= 10  $\mu$ m. (b) Quantitative analysis of colocalization between GLUT4 and different markers by Manders' coefficients expressed as mean  $\pm$  SD (%). At least 20 cells per condition were analyzed (n=20).
